# Supplementary material for: Synergistic effects boosting hydrogen evolution performance of transition metal oxides at ultralow Ru loading levels
Source: Royal Society of Chemistry journal article supplement (doi:10.1039/d3ra01501g), 2023-01-01
Supplement: d3ra01501g1.pdf [file d3ra01501g1.pdf]

Supplementary information to:

## **Synergistic effects boosting hydrogen evolution performance of transition metal oxides at ultralow Ru loading**

Miao Yang,<sup>\*a</sup> Hong Yang,<sup>a</sup> Feng Wang,<sup>a</sup> Yulan Niu<sup>\*a</sup> and Pan Li<sup>\*b</sup>

<sup>a</sup> Collaborative Innovation Center of CO<sub>2</sub> Conversion and Utilization, Department of Chemistry and Chemical Engineering, Taiyuan Institute of Technology, Taiyuan Shanxi, 030008, PR China

E-mail: [m\\_miaoyang@163.com](mailto:m_miaoyang@163.com); [niuyl@tit.edu.cn](mailto:niuyl@tit.edu.cn)

<sup>b</sup> Department of Environment and Safety Engineering, Taiyuan Institute of Technology, Taiyuan Shanxi, 030008, PR China

E-mail: [lipan201104@163.com](mailto:lipan201104@163.com)

## ***Experimental Section***

### **Materials**

KOH (AR,  $\geq 85\%$ ), HCl (AR, 36.0~38.0%), and Ethanol (AR,  $\geq 95\%$ ) were sourced from Sinopharm Chemical Reagent Co., Ltd.  $\text{Ni}(\text{NO}_3)_2 \cdot 6\text{H}_2\text{O}$  (AR, 98%),  $\text{Na}_2\text{MoO}_4$  (AR, 99%), and  $\text{RuCl}_3$  (Ru content 45~55%) were purchased from Aladdin (Shanghai, China). All the reagents were used without any further purification.

### **Synthesis of Ru-NiMoO<sub>4</sub>/NF**

In a typical preparation of the Ru-NiMoO<sub>4</sub>/NF, one piece of commercial Nickel Foam (NF) was cleaned in HCl, ethanol, and DI water by ultrasonic to remove the oxide layer. The cleaned NF was placed in the hydrothermal synthesis reactor with the same mole ratio of  $\text{Na}_2\text{MoO}_4$  and  $\text{Ni}(\text{NO}_3)_2 \cdot 6\text{H}_2\text{O}$  aqueous solution. Then, the hydrothermal synthesis reactor was sealed and heated at 150°C for 6 hour. After cooling to room temperature, the NiMoO<sub>4</sub>/NF precursor was obtained after washed with DI water and ethanol. Then, the obtained NiMoO<sub>4</sub>/NF precursor was immersed into ethanol solution containing  $\text{RuCl}_3$  and heated at 100°C for 12 h. Finally, the sample was placed in a porcelain boat and annealed at 350 °C for 2 h in N<sub>2</sub> atmosphere with the heating rate of 2 min<sup>-1</sup> to synthesis Ru-NiMoO<sub>4</sub>/NF. The mass of the Ru-NiMoO<sub>4</sub>/NF and NiMoO<sub>4</sub>/NF are 6.3 mg cm<sup>-2</sup> and 13.7 mg cm<sup>-2</sup>, respectively.

### **Preparation of Ru+NiMoO<sub>4</sub>/NF**

Briefly, 10 mg of 5 wt.% commercial Ru/C catalyst was dispersed into a solution (40  $\mu\text{L}$  ethanol, 50  $\mu\text{L}$  water, and 10  $\mu\text{L}$  5% Nafion) and sonicated for 30 min to obtain a uniform ink solution. Subsequently, 60  $\mu\text{L}$  of the ink solution was dropped on the NF (1  $\times$  1 cm<sup>2</sup>) and dried at room temperature.

### **Material characterizations**

Scanning electron microscopy (SEM) measurements were conducted to study the morphology of the samples on ZEISS Sigma 300. High-resolution transmission electron microscopy (HR-TEM) was performed on JEOL JEM 2100F. Inductively coupled plasma optical emission spectrometer (ICP-OES) was obtained from Agilent 7850. The sample was dissolved in the mixed solution of nitric acid and hydrochloric acid. Powder X-ray diffraction (XRD) was carried out on Rigaku Miniflex 600. X-ray photoelectron spectroscopy (XPS) was undertaken on Thermo Scientific K-Alpha.  $N_2$  adsorption-desorption isotherm were recorded by Micromeritics ASAP 2460.

## **Electrocatalytic measurements**

Electrochemical workstation (CHI 760E; ShanghaiChenhua Instruments, China) instrument was used to evaluate the electrochemical performance of the catalysts in a standard three-electrode system at room temperature. The as-prepared catalysts cut into  $1 \times 1 \text{ cm}^2$  were as working electrode, the graphite rod was as counter electrode, and the Hg/HgO electrode was as reference electrode. All of the electrochemical data were converted to reversible hydrogen electrode (RHE) according to the following Nernst equation:  $E(\text{RHE}) = E(\text{Hg}/\text{HgO}) + E^\ominus(\text{Hg}/\text{HgO}) + 0.059 \times \text{pH}$ . The Linear sweep voltammetry (LSV) was recorded in 1M KOH with iR compensation at a scan rate of  $5 \text{ mV s}^{-1}$ . EIS measurements were evaluated in the frequency range from 0.1 Hz to 100 kHz with an amplitude of 5 mV. The stability of Ru-NiMoO<sub>4</sub>/NF was tested by chronoamperometric i-t measurement.

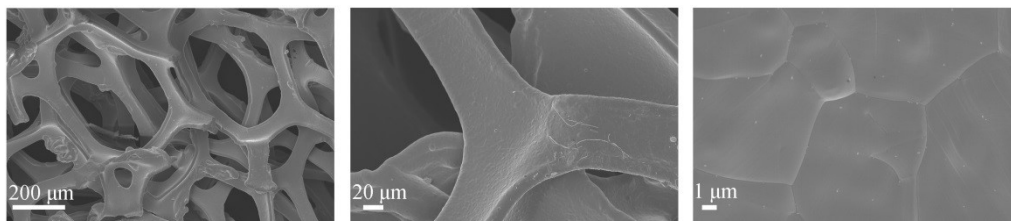

**Fig. S1** SEM images of pure NF at different magnifications.

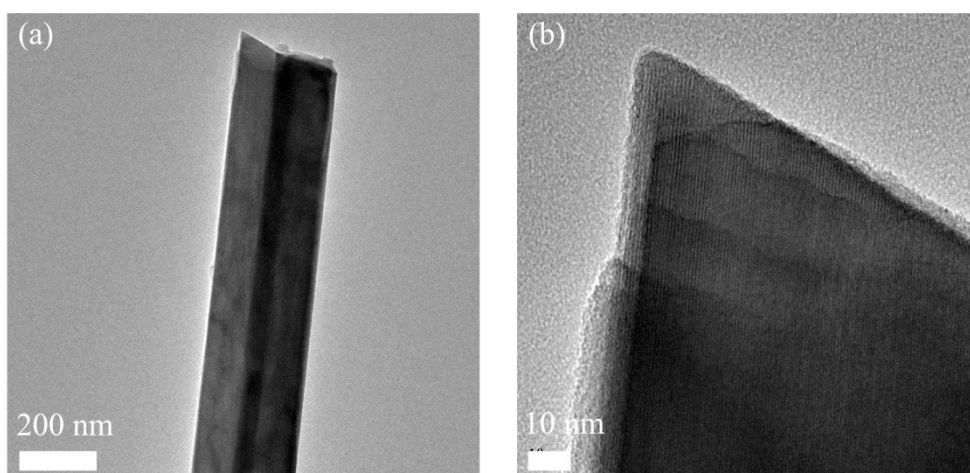

**Fig. S2** TEM images of NiMoO<sub>4</sub>-NF at different magnifications.

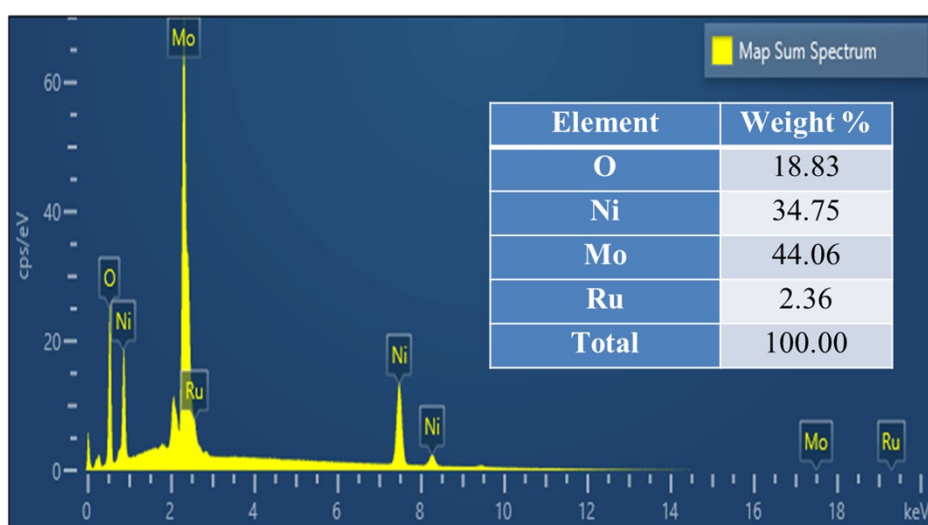

**Fig. S3** The EDS spectrum of Ru-NiMoO<sub>4</sub>-NF.

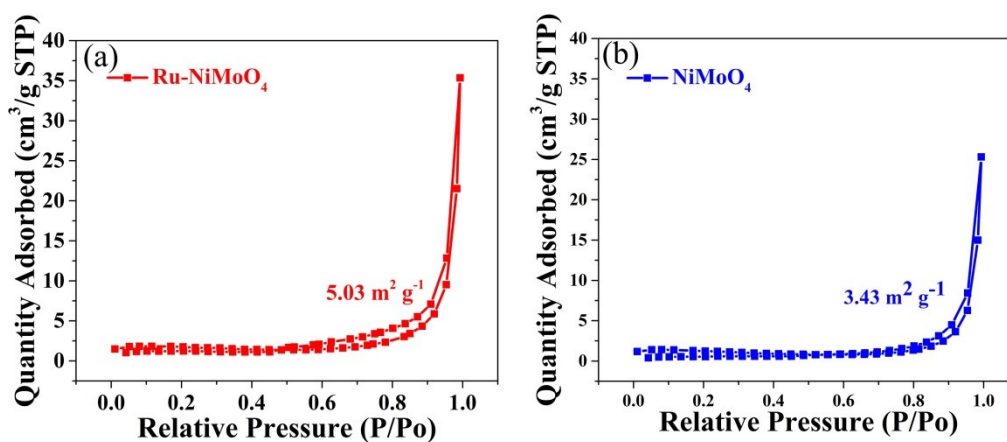

Fig. S4 N<sub>2</sub> adsorption-desorption isotherms of (a) Ru-NiMoO<sub>4</sub>-NF and (b) NiMoO<sub>4</sub>-NF.

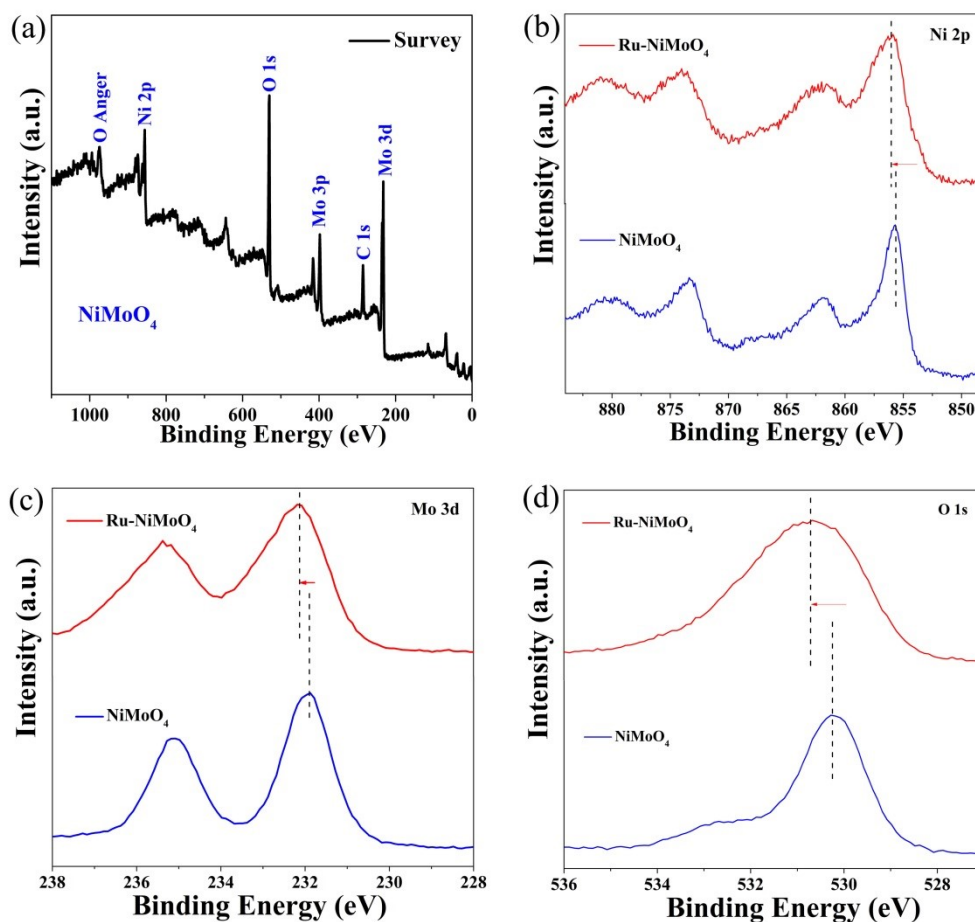

Fig. S5 (a) Full XPS spectrum of NiMoO<sub>4</sub>-NF. High-resolution XPS spectra of (b) Ni 2p, (c) Mo 3d, and (d) O 1s for NiMoO<sub>4</sub>-NF and Ru-NiMoO<sub>4</sub>-NF.

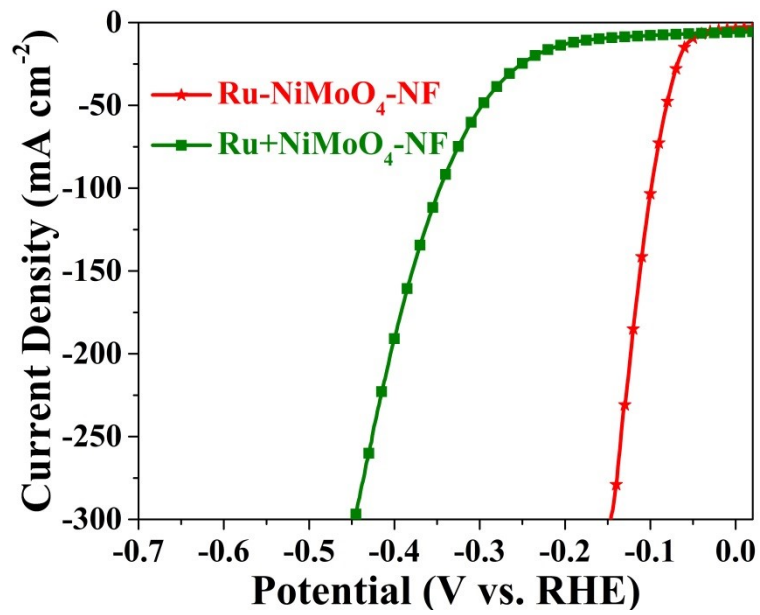

Fig. S6 LSV curves of Ru+NiMoO<sub>4</sub>-NF and Ru-NiMoO<sub>4</sub>-NF in 1 mol/L KOH.

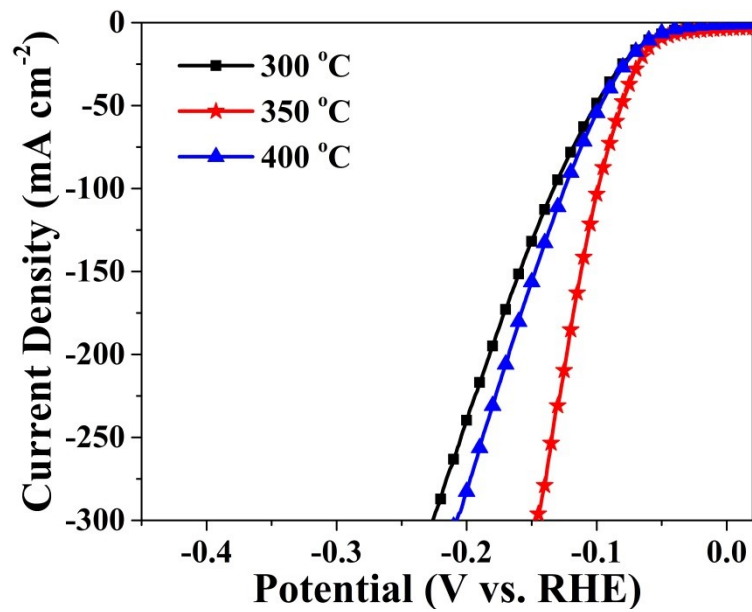

Fig. S7 LSV curves of Ru-NiMoO<sub>4</sub>-NF at different calcination temperature in 1 mol/L KOH.

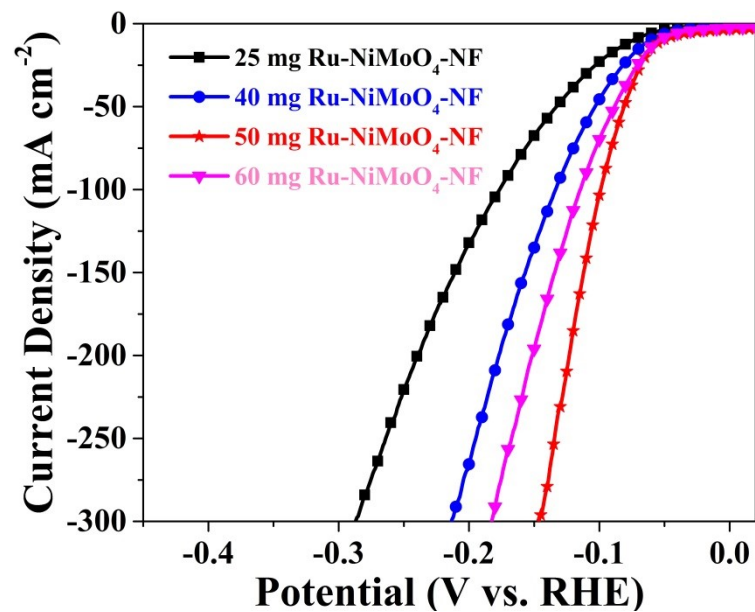

**Fig. S8** LSV curves of Ru-NiMoO<sub>4</sub>-NF with different content of Ru in 1 mol/L KOH.

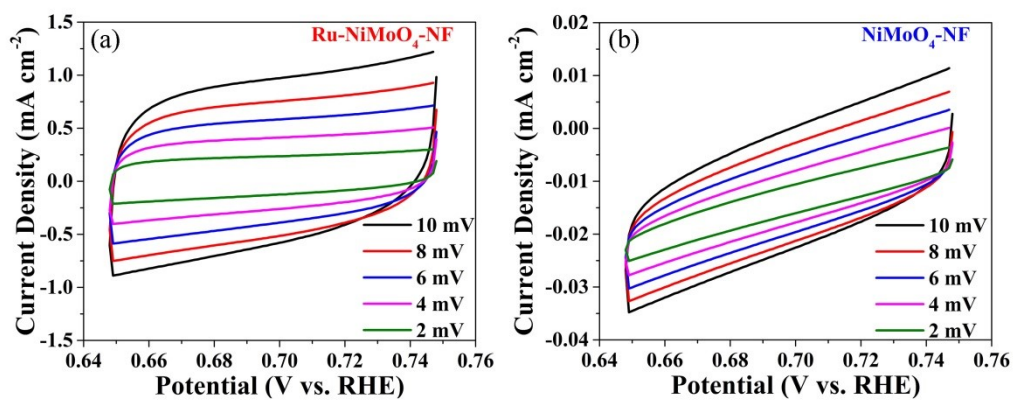

**Fig. S9** The cyclic voltammety curves of (a) Ru-NiMoO<sub>4</sub>-NF and (b) NiMoO<sub>4</sub>-NF in 1.0 M KOH recorded at different scan rates from 2 to 10 mV s<sup>-1</sup>.

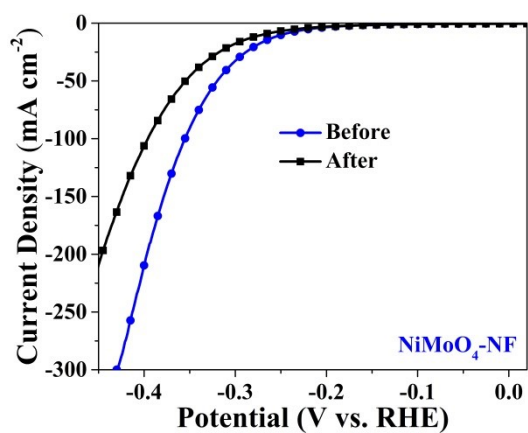

**Fig. S10** Polarization curves of NiMoO<sub>4</sub>-NF before and after 3000 cyclic voltammetry cycles test.

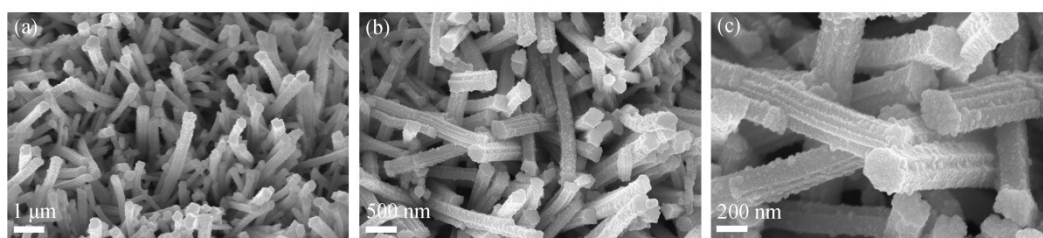

**Fig. S11** SEM images of Ru-NiMoO<sub>4</sub>-NF in alkaline KOH after durability test.

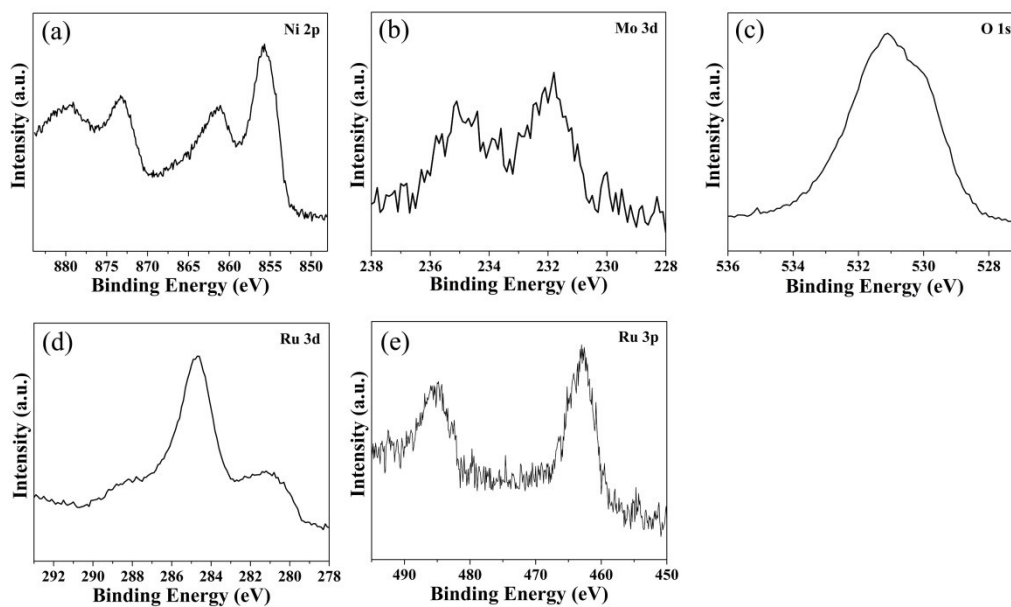

**Fig. S12** (a) Ni 2p, (b) Mo 3d, (c) O 1s, (d) Ru 3d, and (e) Ru 3p XPS spectra of Ru-NiMoO<sub>4</sub>-NF after HER.



**Table S1** Comparing the HER activity of our catalysts with other reported NiMoO<sub>4</sub>-NF electrocatalysts on basis of overpotential at 10 mA cm<sup>-2</sup> and Tafel slope.

| Catalyst                                           | Overpotential at 10 mA cm <sup>-2</sup> | Tafel slope (mV dec <sup>-1</sup> ) | Reference |
|----------------------------------------------------|-----------------------------------------|-------------------------------------|-----------|
| Ru-NiMoO <sub>4</sub> -NF                          | 52                                      | 45                                  | This work |
| NiMoO <sub>4</sub> @Co <sub>3</sub> O <sub>4</sub> | 120                                     | 58                                  | 1         |
| Ru/P-NiMoO <sub>4</sub> @NF                        | --                                      | 89.2                                | 2         |
| Sea urchin-like NiMoO <sub>4</sub> -200/NF         | 68                                      | 91.33                               | 3         |
| RuO <sub>2</sub> -NiMoO-CC-30                      | 37                                      | 61                                  | 4         |
| N-NiMoO <sub>4</sub> /NiS <sub>2</sub>             | 99                                      | 74.2                                | 5         |
| NiMo HNRs/TiM                                      | 92                                      | 78                                  | 6         |
| NiMoN                                              | 109                                     | 95                                  | 7         |
| NiMo-NGTs                                          | 65                                      | 67                                  | 8         |
| Ni-Mo nanopower                                    | 80                                      | --                                  | 9         |

## Reference

1. G. Solomon, A. Landström, R. Mazzaro, M. Jugovac, P. Moras, E. Cattaruzza, V. Morandi, I. Concina and A. Vomiero, NiMoO<sub>4</sub>@Co<sub>3</sub>O<sub>4</sub> core-shell nanorods: in situ catalyst reconstruction toward high efficiency oxygen evolution reaction, *Adv. Energy Mater.*, 2021, **11**, 2101324.
2. L. Guo, J. Chi, J. Zhu, T. Cui, J. Lai and L. Wang, Dual-doping NiMoO<sub>4</sub> with multi-channel structure enable urea-assisted energy-saving H<sub>2</sub> production at large current density in alkaline seawater, *Appl. Catal. B: Environ.*, 2023, **320**, 121977.
3. C. Chen, S. He, K. Dastafkan, Z. Zou, Q. Wang and C. Zhao, Sea urchin-like NiMoO<sub>4</sub> nanorod arrays as highly efficient bifunctional catalysts for electrocatalytic/photovoltage-driven urea electrolysis, *Chinese Journal of Catalysis*, 2022, **43**, 1267-1276.
4. Z. Zhang, H. Wang, M. Ma, H. Liu, Z. Zhang, W. Zhou and H. Liu, Integrating NiMoO wafer as a heterogeneous 'turbo' for engineering robust Ru-based electrocatalyst for overall water splitting, *Chem. Eng. J.*, 2021, **420**, 127686.
5. L. An, J. Feng, Y. Zhang, R. Wang, H. Liu, G.-C. Wang, F. Cheng and P. Xi, Epitaxial heterogeneous interfaces on N-NiMoO<sub>4</sub>/NiS<sub>2</sub> nanowires/nanosheets to boost hydrogen and oxygen production for overall water splitting, *Adv. Funct. Mater.*, 2019, **29**, 1805298.

6. J. Tian, N. Cheng, Q. Liu, X. Sun, Y. He and A. M. Asiri, Self-supported NiMo hollow nanorod array: an efficient 3D bifunctional catalytic electrode for overall water splitting, *J. Mater. Chem. A*, 2015, **3**, 20056-20059.
7. Y. Zhang, B. Ouyang, J. Xu, S. Chen, R. S. Rawat and H. J. Fan, 3D porous hierarchical nickel – molybdenum nitrides synthesized by RF plasma as highly active and stable hydrogen – evolution – reaction electrocatalysts, *Adv. Energy Mater.*, 2016, **6**, 1600221.
8. T. Wang, Y. Guo, Z. Zhou, X. Chang, J. Zheng and X. Li, Ni–Mo nanocatalysts on N-doped graphite nanotubes for highly efficient electrochemical hydrogen evolution in acid, *ACS Nano*, 2016, **10**, 10397-10403.
9. J. R. McKone, B. F. Sadtler, C. A. Werlang, N. S. Lewis and H. B. Gray, Ni–Mo nanopowders for efficient electrochemical hydrogen evolution, *ACS Catal.*, 2013, **3**, 166-169.
